# Supplementary material for: Age at Infection as a Key Predictor of Cyst Burden in Pigs Experimentally Infected with Taenia solium
Source: Research Square preprint supplement (doi:10.21203/rs.3.rs-5883272/v1), 2025-03-21
Supplement: Supplementary file 1 [file ee1ef59c2fa39389319e7908.docx]

**Supplementary information**

Table S1. Median, minimum, and maximum weight of pigs in kilograms (kg) at the time of experimental infection, categorized by age.

|  | weight at infection (kg) | | |
| --- | --- | --- | --- |
| Age at infection | Median | Minimum | Maximum |
| 4 weeks | 7.7 | 5.7 | 12 |
| 7 weeks | 5.6 | 5 | 9.7 |
| 10 weeks | 18.3 | 9.5 | 33 |
| 13 weeks | 20 | 17 | 21 |
| 16 weeks | 16 | 12 | 37 |
| 22 weeks | 68 | 60.7 | 80 |
